# Supplementary material for: Snapshots and ensembles of BTK and cIAP1 protein degrader ternary complexes
Source: Springer Nature journal article supplement (doi:10.1038/s41589-020-00686-2), 2020-11-16
Supplement: 41589_2020_686_MOESM7_ESM.mol [file 41589_2020_686_MOESM7_ESM.mol]

nchembio.A200210894B-comp4.mol
  ChemDraw09212022302D

 70 77  0  0  1  0  0  0  0  0999 V2000
   -4.2462   -0.8402    0.0000 N   0  0  0  0  0  0  0  0  0  0  0  0
   -3.9066   -1.5940    0.0000 N   0  0  0  0  0  0  0  0  0  0  0  0
   -4.5226   -2.1463    0.0000 C   0  0  0  0  0  0  0  0  0  0  0  0
   -5.2356   -1.7322    0.0000 C   0  0  0  0  0  0  0  0  0  0  0  0
   -5.0690   -0.9265    0.0000 C   0  0  0  0  0  0  0  0  0  0  0  0
   -4.4364   -2.9691    0.0000 C   0  0  0  0  0  0  0  0  0  0  0  0
   -3.6826   -3.3028    0.0000 C   0  0  0  0  0  0  0  0  0  0  0  0
   -3.5964   -4.1257    0.0000 C   0  0  0  0  0  0  0  0  0  0  0  0
   -4.2633   -4.6089    0.0000 C   0  0  0  0  0  0  0  0  0  0  0  0
   -5.0171   -4.2751    0.0000 C   0  0  0  0  0  0  0  0  0  0  0  0
   -5.1033   -3.4523    0.0000 C   0  0  0  0  0  0  0  0  0  0  0  0
   -4.1771   -5.4317    0.0000 O   0  0  0  0  0  0  0  0  0  0  0  0
   -3.8321   -0.1267    0.0000 C   0  0  0  0  0  0  0  0  0  0  0  0
   -4.2462    0.5869    0.0000 C   0  0  0  0  0  0  0  0  0  0  0  0
   -3.8321    1.3058    0.0000 C   0  0  0  0  0  0  0  0  0  0  0  0
   -3.0093    1.3058    0.0000 C   0  0  0  0  0  0  0  0  0  0  0  0
   -2.5952    0.5869    0.0000 N   0  0  0  0  0  0  0  0  0  0  0  0
   -3.0093   -0.1267    0.0000 C   0  0  0  0  0  0  0  0  0  0  0  0
   -5.9899   -2.0718    0.0000 C   0  0  0  0  0  0  0  0  0  0  0  0
   -6.6627   -1.5881    0.0000 N   0  0  0  0  0  0  0  0  0  0  0  0
   -6.0761   -2.8941    0.0000 O   0  0  0  0  0  0  0  0  0  0  0  0
   -5.6213   -0.3110    0.0000 N   0  0  0  0  0  0  0  0  0  0  0  0
   -4.8446   -5.9149    0.0000 C   0  0  0  0  0  0  0  0  0  0  0  0
   -4.7583   -6.7377    0.0000 C   0  0  0  0  0  0  0  0  0  0  0  0
   -5.4258   -7.2209    0.0000 C   0  0  0  0  0  0  0  0  0  0  0  0
   -6.1795   -6.8872    0.0000 C   0  0  0  0  0  0  0  0  0  0  0  0
   -6.2658   -6.0649    0.0000 C   0  0  0  0  0  0  0  0  0  0  0  0
   -5.5983   -5.5812    0.0000 C   0  0  0  0  0  0  0  0  0  0  0  0
   -4.0046   -7.0774    0.0000 F   0  0  0  0  0  0  0  0  0  0  0  0
   -6.8470   -7.3704    0.0000 F   0  0  0  0  0  0  0  0  0  0  0  0
   -1.7665    0.5869    0.0000 C   0  0  0  0  0  0  0  0  0  0  0  0
   -1.3577   -0.1267    0.0000 O   0  0  0  0  0  0  0  0  0  0  0  0
   -1.3577    1.3058    0.0000 C   0  0  0  0  0  0  0  0  0  0  0  0
    3.5959   -2.9862    0.0000 C   0  0  0  0  0  0  0  0  0  0  0  0
    3.1877   -2.2727    0.0000 N   0  0  0  0  0  0  0  0  0  0  0  0
    3.5959   -1.5538    0.0000 C   0  0  0  0  0  0  0  0  0  0  0  0
    3.1877   -0.8402    0.0000 C   0  0  0  0  0  0  0  0  0  0  0  0
    3.5959   -0.1267    0.0000 N   0  0  0  0  0  0  0  0  0  0  0  0
    3.1877    0.5869    0.0000 C   0  0  0  0  0  0  0  0  0  0  0  0
    3.5959    1.3058    0.0000 C   0  0  0  0  0  0  0  0  0  0  0  0
    2.3589   -0.8402    0.0000 O   0  0  0  0  0  0  0  0  0  0  0  0
    4.4246   -1.5538    0.0000 C   0  0  0  0  0  0  0  0  0  0  0  0
    2.3589    0.5869    0.0000 C   0  0  0  0  0  0  0  0  0  0  0  0
    0.7074    0.5869    0.0000 N   0  0  0  0  0  0  0  0  0  0  0  0
    1.1220   -0.1267    0.0000 C   0  0  0  0  0  0  0  0  0  0  0  0
    1.9448   -0.1267    0.0000 C   0  0  0  0  0  0  0  0  0  0  0  0
    1.9448    1.3058    0.0000 C   0  0  0  0  0  0  0  0  0  0  0  0
    1.1220    1.3058    0.0000 C   0  0  0  0  0  0  0  0  0  0  0  0
    4.4246    1.3058    0.0000 O   0  0  0  0  0  0  0  0  0  0  0  0
    3.1877    2.0193    0.0000 N   0  0  0  0  0  0  0  0  0  0  0  0
    2.3648    2.1056    0.0000 C   0  0  0  0  0  0  0  0  0  0  0  0
    3.5214    2.7730    0.0000 C   0  0  0  0  0  0  0  0  0  0  0  0
    2.9054    3.3253    0.0000 C   0  0  0  0  0  0  0  0  0  0  0  0
    2.1923    2.9107    0.0000 C   0  0  0  0  0  0  0  0  0  0  0  0
    4.3266    2.9455    0.0000 C   0  0  0  0  0  0  0  0  0  0  0  0
    4.9421    2.3932    0.0000 S   0  0  0  0  0  0  0  0  0  0  0  0
    5.6556    2.8073    0.0000 C   0  0  0  0  0  0  0  0  0  0  0  0
    5.4831    3.6130    0.0000 C   0  0  0  0  0  0  0  0  0  0  0  0
    4.6662    3.6993    0.0000 N   0  0  0  0  0  0  0  0  0  0  0  0
    6.0413    4.2285    0.0000 C   0  0  0  0  0  0  0  0  0  0  0  0
    5.7826    5.0112    0.0000 C   0  0  0  0  0  0  0  0  0  0  0  0
    6.8470    4.0560    0.0000 O   0  0  0  0  0  0  0  0  0  0  0  0
    4.7182    5.9663    0.0000 C   0  0  0  0  0  0  0  0  0  0  0  0
    4.9769    5.1837    0.0000 C   0  0  0  0  0  0  0  0  0  0  0  0
    6.3349    5.6267    0.0000 C   0  0  0  0  0  0  0  0  0  0  0  0
    6.0815    6.4093    0.0000 C   0  0  0  0  0  0  0  0  0  0  0  0
    5.2705    6.5818    0.0000 C   0  0  0  0  0  0  0  0  0  0  0  0
    5.0171    7.3704    0.0000 F   0  0  0  0  0  0  0  0  0  0  0  0
   -0.1154    0.5869    0.0000 C   0  0  0  0  0  0  0  0  0  0  0  0
   -0.5295    1.3058    0.0000 C   0  0  0  0  0  0  0  0  0  0  0  0
  1  2  1  0      
  5  1  1  0      
 13  1  1  6      
  2  3  2  0      
  3  4  1  0      
  3  6  1  0      
  4  5  2  0      
  4 19  1  0      
  5 22  1  0      
 11  6  1  0      
  6  7  2  0      
  7  8  1  0      
  8  9  2  0      
  9 10  1  0      
  9 12  1  0      
 10 11  2  0      
 12 23  1  0      
 13 14  1  0      
 13 18  1  0      
 14 15  1  0      
 15 16  1  0      
 16 17  1  0      
 17 18  1  0      
 17 31  1  0      
 19 20  1  0      
 19 21  2  0      
 23 24  2  0      
 28 23  1  0      
 24 25  1  0      
 24 29  1  0      
 25 26  2  0      
 26 27  1  0      
 26 30  1  0      
 27 28  2  0      
 31 32  2  0      
 31 33  1  0      
 33 70  1  0      
 34 35  1  0      
 35 36  1  0      
 36 37  1  0      
 36 42  1  6      
 37 38  1  0      
 37 41  2  0      
 38 39  1  0      
 39 40  1  0      
 39 43  1  1      
 40 49  2  0      
 40 50  1  0      
 46 43  1  0      
 43 47  1  0      
 44 45  1  0      
 44 48  1  0      
 44 69  1  0      
 45 46  1  0      
 47 48  1  0      
 51 50  1  0      
 50 52  1  0      
 51 54  1  0      
 52 53  1  0      
 52 55  1  1      
 53 54  1  0      
 55 56  1  0      
 55 59  2  0      
 56 57  1  0      
 57 58  2  0      
 58 59  1  0      
 58 60  1  0      
 60 61  1  0      
 60 62  2  0      
 64 61  2  0      
 61 65  1  0      
 63 64  1  0      
 63 67  2  0      
 65 66  2  0      
 66 67  1  0      
 67 68  1  0      
 69 70  1  0      
M  END
